# Supplementary material for: Highly emissive near-infrared solid organic fluorophores for visualization of latent fingerprints based on the powder dusting method
Source: Royal Society of Chemistry journal article supplement (doi:10.1039/d1tc01183a), 2021-01-01
Supplement: d1tc01183a1.pdf [file d1tc01183a1.pdf]

Electronic Supporting Information (ESI)

**Highly Emissive Near-Infrared Solid Organic Fluorophores for Visualization of Latent Fingerprints based on Mobile-Phone Photographing**

Zheng Lv, Zhongwei Man, Zhenzhen Xu,\* Shuai Li, Qing Liao and Hongbing Fu\*

# **1. Materials and methods**

## **1.1 Materials**

All reagents for organic synthesis were commercially available and used as received without further purification. Montmorillonite (MMT) powder was brought from Innochem. Traditional magnetic powders (ferric oxide) and commercial fingerprint powders were purchased from U-MAG Materials Company and Beijing BoNa HengDa Technology, respectively. 405 nm LED lamp (3W) was purchased from ANJOET.

## **1.2 Methods**

### **1.2.1 Characterization Methods**

The compound was confirmed by High resolution mass spectroscopy (GCT-MS Micromass, UK) and <sup>1</sup>H-NMR (400 MHz, 293K). The absorption spectra were recorded by Shimidazu UV-3600 UV-VIS-NIR spectrophotometer and the fluorescence spectra were measured by a FluoroMax-4 (Horiba). The fluorescence lifetimes and quantum yields were measured based on Edinburgh Instrument FLS1000 Integrating sphere.

### **1.2.2 Preparation of single crystals**

CASN and TASN single crystals were obtained by the slow evaporation of the saturated dichloromethane solution at room temperature. IM-1 single crystals were prepared by the solvent diffusion method at the liquid-liquid interface between dichloromethane and petroleum ether solution at room temperature.

### **1.2.3 Collection of fingerprints**

The volunteers were asked to lightly touch their foreheads with their fingers and then pressed their fingers on the different substrate surfaces.

### **1.2.4 Development of LFPs by powder dusting method.**

The 0.2-4 mg TASN were dissolved in dichloromethane (DCM) and 20 mg MMT were added. After sonication for 5 min, the solvent was evaporated by rotary evaporator. The obtained powders were grounded by mortar to completely mix TASN

with MMT. The products were dried in oven for overnight and stored in dry vessels before use. A small amount of fingerprint powders were carefully added on these substrates printed with LFPs for about 5 s. Then excessive powders could be gently blew away by rubber suction bulb .

### 1.2.5 Image acquisition equipment.

The LFP images were obtained under 405 nm LED lamp (ANJOET-501B, 3W), with an iPhone 6s plus as the signal collector. Grayscale analysis was performed by ImagJ software from the National Institutes of Health (U.S.).

## 2. General procedure for the synthesis of target compounds

### 2.1 Synthesis of CASN

#### Synthesis of IM-1

The synthetic method was modified by the reported procedure. <sup>[S1]</sup>

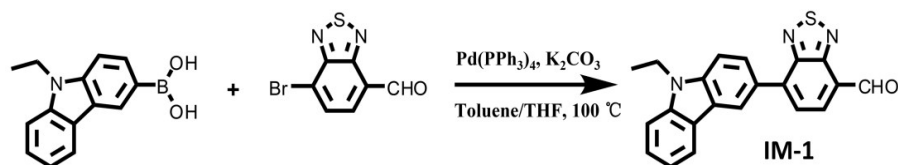

Scheme S1. Synthetic route of IM-1.

#### Synthesis of IM

The synthesis of IM was reported in the previous work.<sup>1</sup>

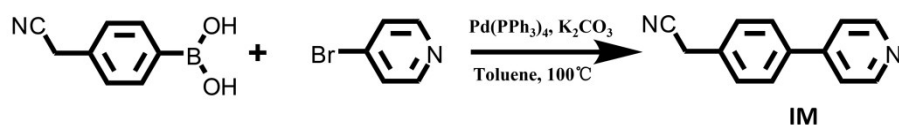

Scheme S2. Synthetic route of IM.

#### Synthesis of CASN

IM-1(0.715 g, 2 mmol), IM (0.388 g, 2 mmol) and a certain amount of NaOCH<sub>3</sub> (0.011g,0.2 mmol) were added in 15 mL ethanol and 10 mL THF. Then the mixture were stirred at room temperature for 12h. The resulting compound was filteres and repeatedly washed with 50 % EtOH aqueous solution to give red powders (0.652 g, 61.2%).

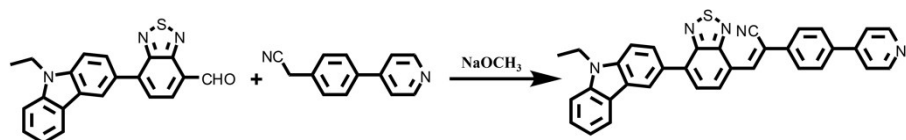

**Scheme S3.** Synthetic route of CASN.

## 2.2 Synthesis of TASN

### Synthesis of IM-2

The synthetic method was modified by the reported procedure. [S1]

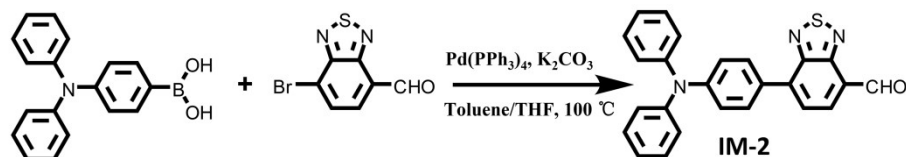

**Scheme S4.** Synthetic route of IM-2.

### Synthesis of IM

The synthesis of IM was reported in the previous work. [S2]

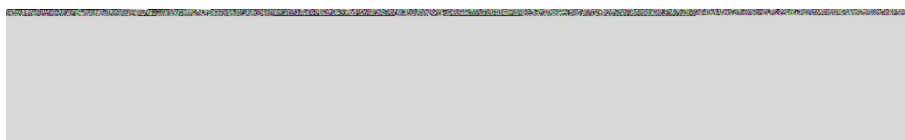

**Scheme S2.** Synthetic route of IM.

### Synthesis of TASN

IM-2(0.810 g, 2 mmol), IM (0.388 g, 2 mmol) and a certain amount of NaOCH<sub>3</sub> (0.011g,0.2 mmol) were added in 15 mL ethanol and 10 mL THF. Then the mixture were stirred at room temperature for 12h. The resulting compound was filteres and repeatedly washed with 50 % EtOH aqueous solution to give red powders (0.842 g, 72%).

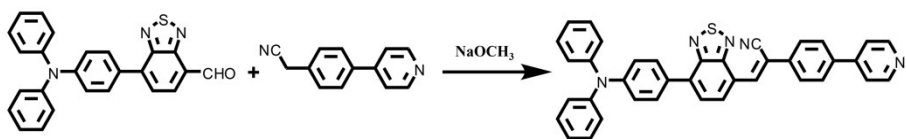

**Scheme S3.** Synthetic route of TASN.

### 3. Supplementary figures and tables

**Table S1.** The reported organic dyes for LFP development

| compound    | $\lambda_{ex}$ | $\lambda_{em}$ | time        | medium                              | reference                             |
|-------------|----------------|----------------|-------------|-------------------------------------|---------------------------------------|
| TPE         | 365 nm         | ~ 440 nm       | 5 min       | CH <sub>3</sub> CN/H <sub>2</sub> O | Chem. Commun. 2012, 48, 4109          |
| DPPS-2      | 365 nm         | 518 nm         | 2 min       | CH <sub>3</sub> CN/H <sub>2</sub> O | J. Mater. Chem. C, 2016, 4, 11180     |
| NIFA        | 365 nm         | 525 nm         | 17 min      | Ethanol/H <sub>2</sub> O            | Sens. Actuators, B. 2019, 283, 99     |
| FLA-2       | 365 nm         | 525 nm         | 20 min      | CH <sub>3</sub> CN/H <sub>2</sub> O | Analyst. 2020, 145, 2311              |
| DPSA        | 365 nm         | 564 nm         | 5 min       | CH <sub>3</sub> CN/H <sub>2</sub> O | New J. Chem. 2018, 42, 12900          |
| NIR-LP      | 365 nm         | ~ 650 nm       | 20 min      | CH <sub>3</sub> CN/H <sub>2</sub> O | RSC Adv., 2015, 5, 87306              |
| TPA-1OH     | 405 nm         | 658 nm         | 30 s        | H <sub>2</sub> O                    | J. Am. Chem. Soc. 2020, 142,7497      |
| BN-9        | 365 nm         | 505 nm         | 30 s        | none                                | Angew. Chem. Int. Ed. 2019, 58, 10132 |
| TPE-4DPA    | 365 nm         | 500 nm         | none        | magnetic powder                     | Sci China Chem, 2018, 61, 966         |
| SAA         | 365 nm         | 550 nm         | 30 s        | montmorillonite                     | Mater. Chem. Front., 2020,4, 2131     |
| DMAS-TP     | 365 nm         | 615 nm         | none        | silica                              | J. Mater. Chem. C, 2021               |
| <b>TASN</b> | <b>405 nm</b>  | <b>686 nm</b>  | <b>10 s</b> | <b>montmorillonite</b>              | <b>This work</b>                      |

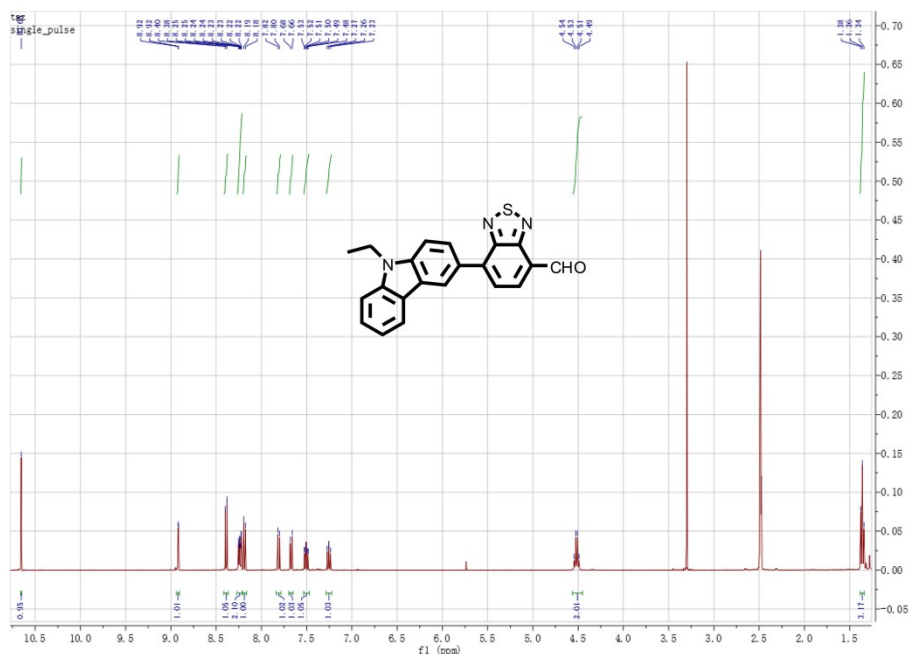

**Fig. S1** <sup>1</sup>HNMR spectrum of compound IM-1. <sup>1</sup>HNMR (400 MHz, DMSO-d<sub>6</sub>)  $\delta$  10.65 (s, 1H), 8.92 (d, J = 1.4 Hz, 1H), 8.39 (d, J = 7.5 Hz, 1H), 8.27 – 8.21 (m, 2H), 8.19 (d, J = 7.3 Hz, 1H), 7.81 (d, J = 8.5 Hz, 1H), 7.67 (d, J = 8.2 Hz, 1H), 7.53 – 7.47 (m, 1H), 7.28 – 7.22 (m, 1H), 4.52 (q, J = 7.1 Hz, 2H), 1.36 (t, J = 7.2 Hz, 3H).

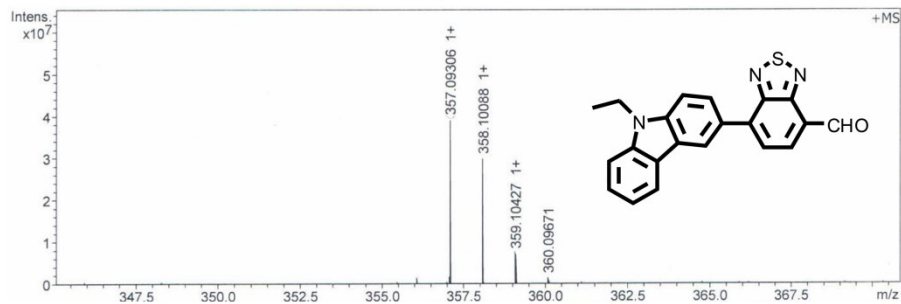

**Fig. S2** HR-MS (MALDI-MS) spectrum of IM-1,  $m/z = 357$ .

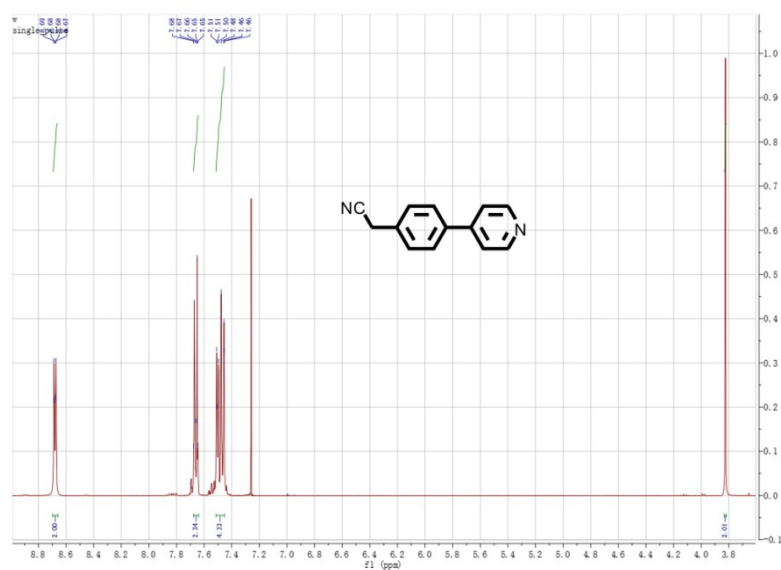

**Fig. S3**  $^1\text{H}$  NMR (400 MHz, Chloroform- $d$ )  $\delta$  8.68 (dd,  $J = 4.7, 1.4$  Hz, 2H), 7.68 – 7.64 (m, 2H), 7.51 – 7.45 (m, 4H), 3.82 (s, 2H).

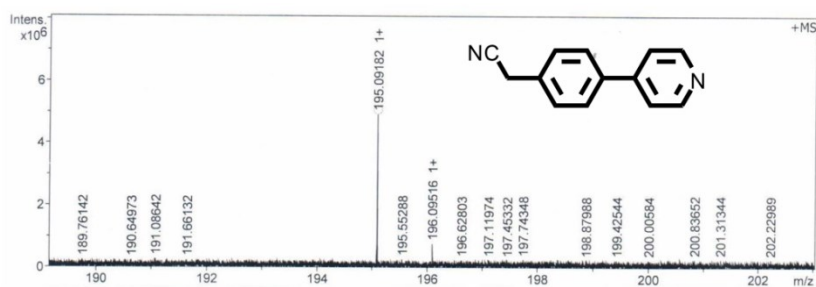

**Fig. S4** HR-MS (MALDI-MS) spectrum of IM,  $m/z = 194$ .

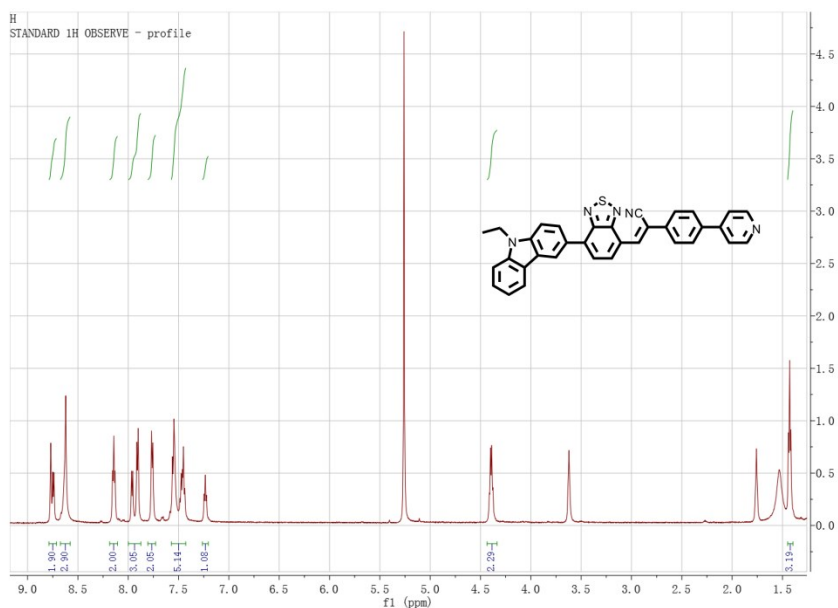

**Fig. S5**  $^1\text{H}$  NMR (600 MHz, Methylene Chloride- $d_2$ )  $\delta$  8.79 – 8.71 (m, 2H), 8.62 (s, 3H), 8.14 (t,  $J = 7.4$  Hz, 2H), 7.93 (dd,  $J = 31.8, 7.6$  Hz, 3H), 7.76 (d,  $J = 7.9$  Hz, 2H), 7.57 – 7.43 (m, 5H), 7.23 (t,  $J = 7.2$  Hz, 1H), 4.39 (q,  $J = 7.3$  Hz, 2H), 1.43 (t,  $J = 7.3$  Hz, 3H).

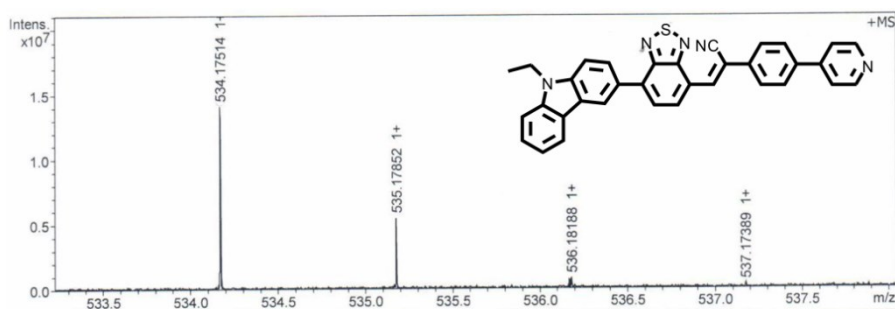

**Fig. S6** HR-MS (MALDI-MS) spectrum of CASN,  $m/z = 533$ .

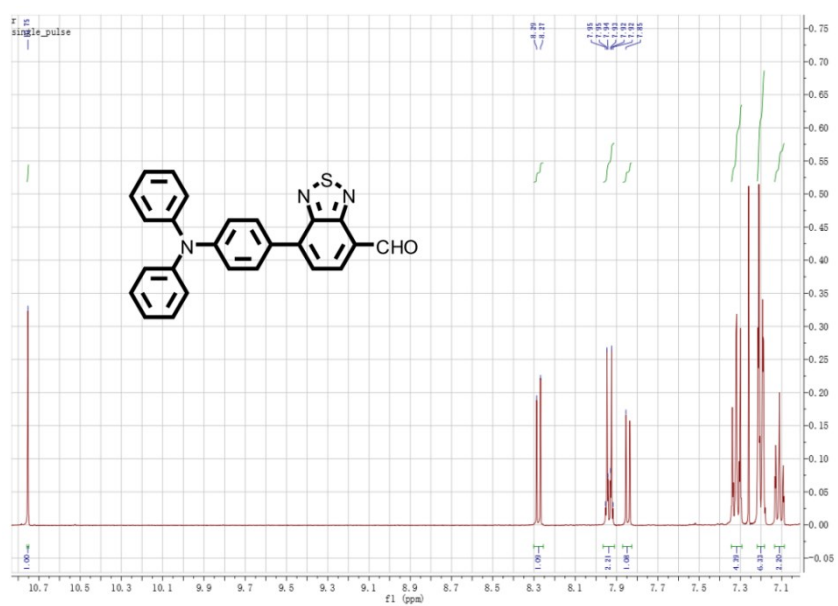

**Fig. S7**  $^1\text{H}$  NMR (400 MHz, Chloroform- $d$ )  $\delta$  10.75 (s, 1H), 8.28 (d,  $J = 7.4$  Hz, 1H), 7.96 – 7.91 (m, 2H), 7.85 (s, 1H), 7.32 (s, 4H), 7.21 (d,  $J = 1.9$  Hz, 6H), 7.12 (d,  $J = 4.9$  Hz, 2H).

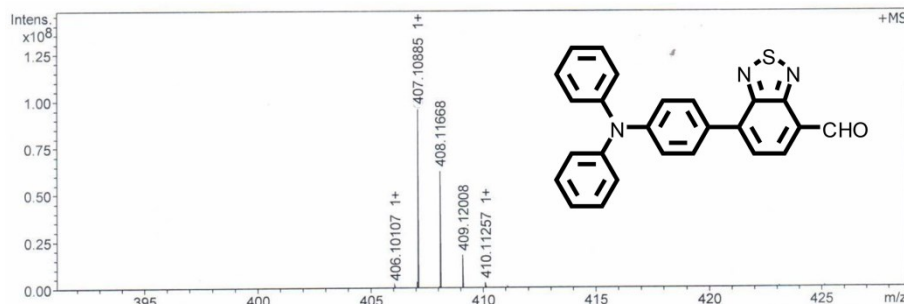

**Fig. S8** HR-MS (MALDI-MS) spectrum of IM-2,  $m/z = 407$ .

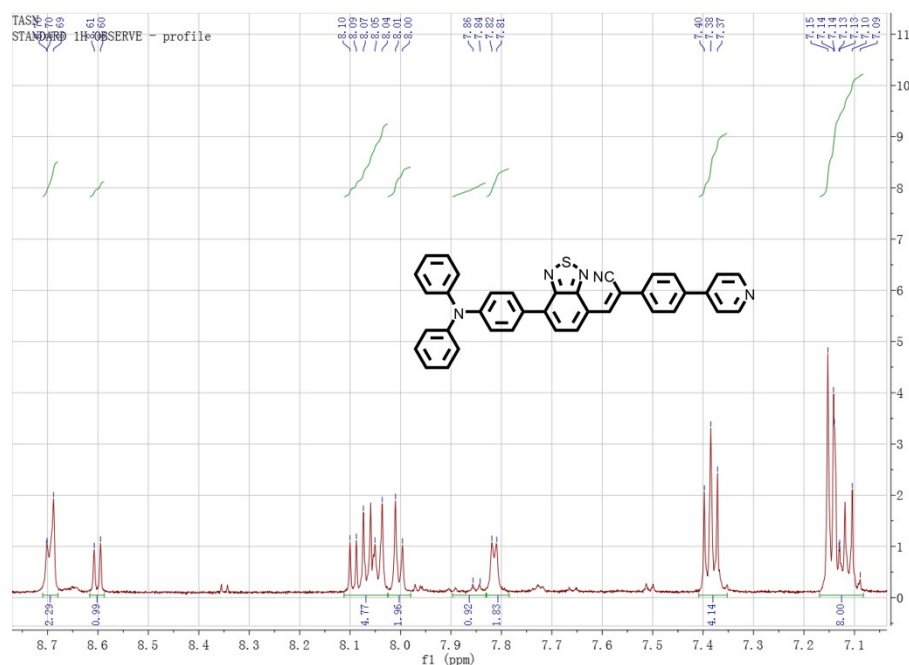

**Fig. S9**  $^1\text{H}$  NMR (600 MHz, DMSO- $d_6$ )  $\delta$  8.71 – 8.68 (m, 2H), 8.60 (d,  $J = 7.4$  Hz, 1H), 8.11 – 8.03 (m, 5H), 8.00 (d,  $J = 8.4$  Hz, 2H), 7.85 (d,  $J = 8.5$  Hz, 1H), 7.81 (d,  $J = 5.8$  Hz, 2H), 7.41 – 7.35 (m, 4H), 7.17 – 7.08 (m, 8H).

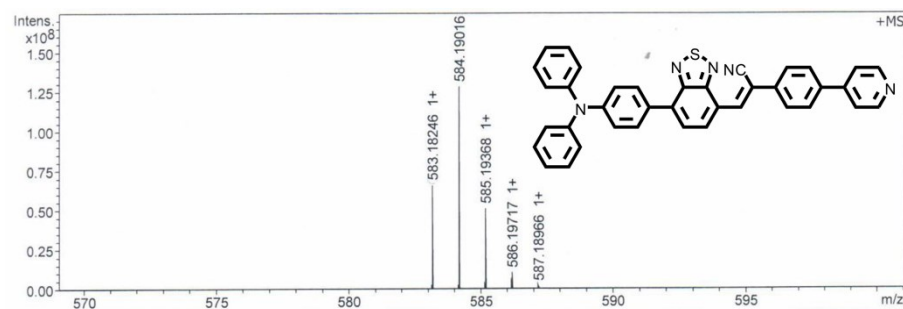

**Fig. S10** HR-MS (MALDI-MS) spectrum of TASN,  $m/z = 583$ .



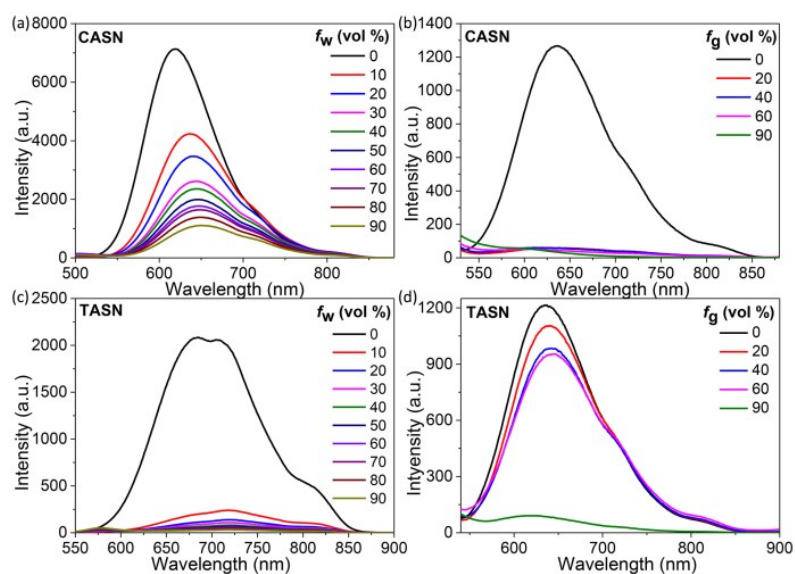

**Fig. S11** The emission spectra of (a) CASN and (c) TASN in mixtures of THF-water with different water fractions ( $f_w$ ). The emission spectra of (b) CASN and (d) TASN in mixtures of ethanol-glycerol with different glycerol fractions ( $f_g$ ).

**Notes:** We have performed the AIE tests of CASN and TASN. CASN and TASN were first dissolved in THF solution, respectively. The emission intensities gradually decreased after addition of a poor solvent of water with different fractions into its THF solution. Moreover, the emission intensities gradually decreased after addition of glycerin with different fractions into its ethanol solution. These results indicated that CASN and TASN didn't exhibit typical AIE characteristic. Hence, CASN and TASN are not AIE-active fluorophores.

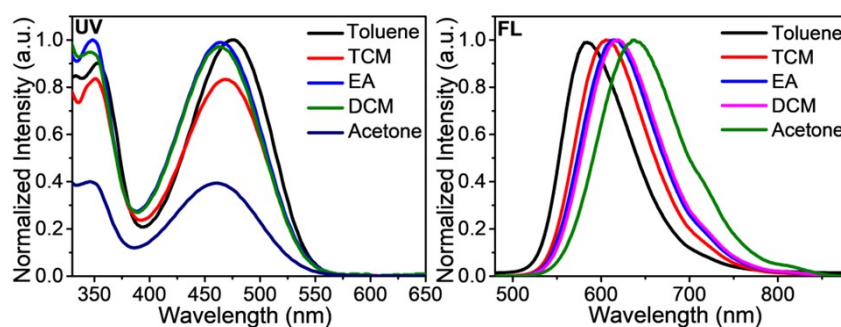

**Fig. S12** The UV absorption spectra and FL emission spectra of CASN, measured in the different solvents with increasing polarity.

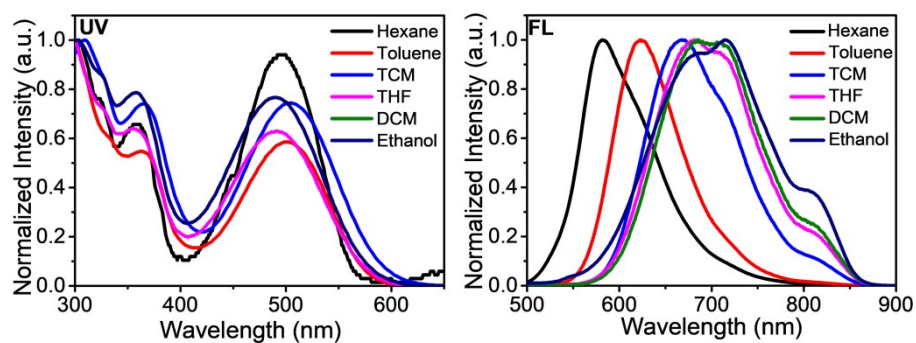

**Fig. S13** The UV absorption spectra and FL emission spectra of TASN, measured in the different solvents with increasing polarity.

**Table S2.** Detailed photo-physical data of CASN and TASN in the different solvents

|      | solvent | $\Delta f$ | $\epsilon$<br>$L^*mol^{-1}cm^{-1}$ | $\lambda_{abs}$<br>(nm) | $\lambda_{em}$<br>(nm) | Stokes'<br>Shift(nm) | $\Phi$ | $\tau$<br>(ns) | $k_r$<br>( $ns^{-1}$ ) | $k_{nr}$<br>( $ns^{-1}$ ) |
|------|---------|------------|------------------------------------|-------------------------|------------------------|----------------------|--------|----------------|------------------------|---------------------------|
| CASN | Toluene | 0.018      | 35140                              | 475                     | 584                    | 109                  | 0.838  | 3.71           | 0.226                  | 0.044                     |
|      | TCM     | 0.145      | 27428                              | 468                     | 605                    | 137                  | 0.591  | 3.31           | 0.178                  | 0.123                     |
|      | EA      | 0.200      | 12780                              | 464                     | 616                    | 152                  | 0.512  | 3.41           | 0.159                  | 0.134                     |
|      | DCM     | 0.218      | 42306                              | 462                     | 618                    | 156                  | 0.507  | 3.37           | 0.150                  | 0.146                     |
|      | Acetone | 0.284      | 23469                              | 460                     | 637                    | 177                  | 0.334  | 4.04           | 0.083                  | 0.164                     |
| TASN | Toluene | 0.018      | 21000                              | 503                     | 623                    | 120                  | 0.990  | 4.36           | 0.227                  | 0.023                     |
|      | TCM     | 0.145      | 22120                              | 504                     | 668                    | 164                  | 0.699  | 4.94           | 0.141                  | 0.061                     |
|      | THF     | 0.211      | 26050                              | 491                     | 682                    | 191                  | 0.391  | 2.94           | 0.133                  | 0.210                     |
|      | DCM     | 0.218      | 11350                              | 491                     | 686                    | 195                  | 0.310  | 2.81           | 0.110                  | 0.250                     |
|      | Ethanol | 0.288      | 26000                              | 490                     | 715                    | 225                  | 0.077  | 2.94           | 0.026                  | 0.313                     |

**Table S3.** Summary of the single crystals data of IM-1, CASN and TASN.

|                 | IM-1        | CASN       | TASN        |
|-----------------|-------------|------------|-------------|
| CCDC            | 205362      | 2048593    | 2048597     |
| Crystal system  | Triclinic   | Triclinic  | Triclinic   |
| Space group     | P-1         | P-1        | P-1         |
| $a/\text{\AA}$  | 12.1454(2)  | 10.3589(3) | 8.9522(6)   |
| $b/\text{\AA}$  | 19.0331(2)  | 11.2429(2) | 11.9366(9)  |
| $c/\text{\AA}$  | 22.7194(3)  | 23.5516(7) | 13.9351(10) |
| $\alpha/^\circ$ | 95.0070(10) | 89.688(2)  | 92.148(6)   |
| $\beta/^\circ$  | 97.8220(10) | 78.968(2)  | 91.879(6)   |

|                                            |                                    |                                    |                                    |
|--------------------------------------------|------------------------------------|------------------------------------|------------------------------------|
| $\gamma/^\circ$                            | 106.8050(10)                       | 87.836(2)                          | 102.640(6)                         |
| $v/\text{\AA}^3$                           | 4936.26(12)                        | 2690.30(12)                        | 1450.69(18)                        |
| Z Value                                    | 12                                 | 4                                  | 2                                  |
| $v/z/\text{\AA}^3$                         | 411.35                             | 672.575                            | 725.345                            |
| $\rho_{calc}/\text{g cm}^{-3}$             | 1.870                              | 1.317                              | 1.336                              |
| Final R indexes [ $I \geq 2\sigma$<br>(I)] | $R_1 = 0.0566,$<br>$wR_2 = 0.2062$ | $R_1 = 0.0409,$<br>$wR_2 = 0.1075$ | $R_1 = 0.0505,$<br>$wR_2 = 0.1132$ |
| Final R indexes [all<br>data]              | $R_1 = 0.0915,$<br>$wR_2 = 0.2572$ | $R_1 = 0.0505,$<br>$wR_2 = 0.1157$ | $R_1 = 0.0695,$<br>$wR_2 = 0.1255$ |
| GOF                                        | 0.885                              | 1.031                              | 1.042                              |

**Table S4.** Summarization of weak interactions in the crystals of CASN and TASN.

| CASN | Interactions | d/\AA |
|------|--------------|-------|
| 1    | C3 H24       | 2.675 |
| 2    | N4 N8        | 3.066 |
| 3    | N4 C51       | 3.142 |
| 4    | C21 H44      | 2.730 |
| 5    | C7 H26       | 2.705 |
| 6    | C8 H26       | 2.886 |
| 7    | S1 N7        | 2.971 |
| 8    | S1 C45       | 3.292 |
| 9    | N3 S2        | 3.296 |
| 10   | N3 N7        | 3.090 |
| 11   | C37 H60      | 2.844 |
| 12   | C38 H59      | 2.866 |
| 13   | C48 H59      | 2.792 |

| 14   | N9 H53       | 2.693 |
|------|--------------|-------|
| 15   | C40 H68      | 2.807 |
| TASN | Interactions | d/Å   |
| 1    | H37 C30      | 2.913 |
| 2    | N2 H26       | 2.863 |
| 3    | C38 H21      | 2.881 |

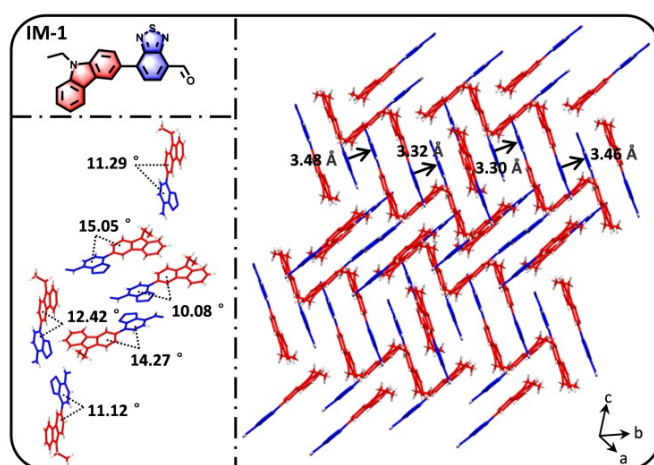

**Fig. S14** The molecular structure of IM-1 (intermediate of CASN) and its illustration of crystal packing as well as intermolecular interaction.

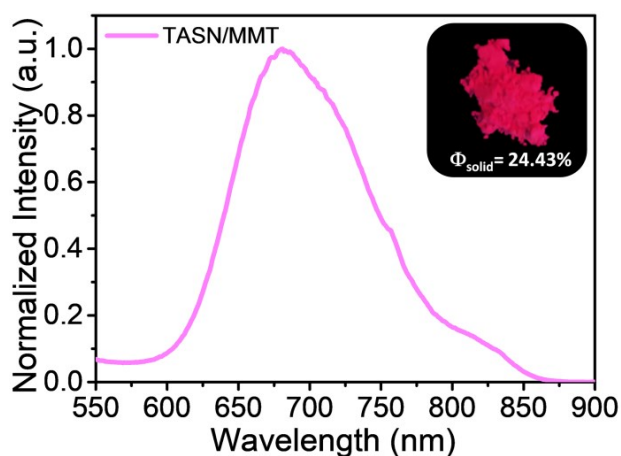

**Fig. S15** Emission spectrum and photographs of TASN/MMT powder ( $f_{\text{TASN}} = 10\%$ ) under 365 nm UV excitation, including solid-state quantum yield ( $\Phi_{\text{solid}}$ ).

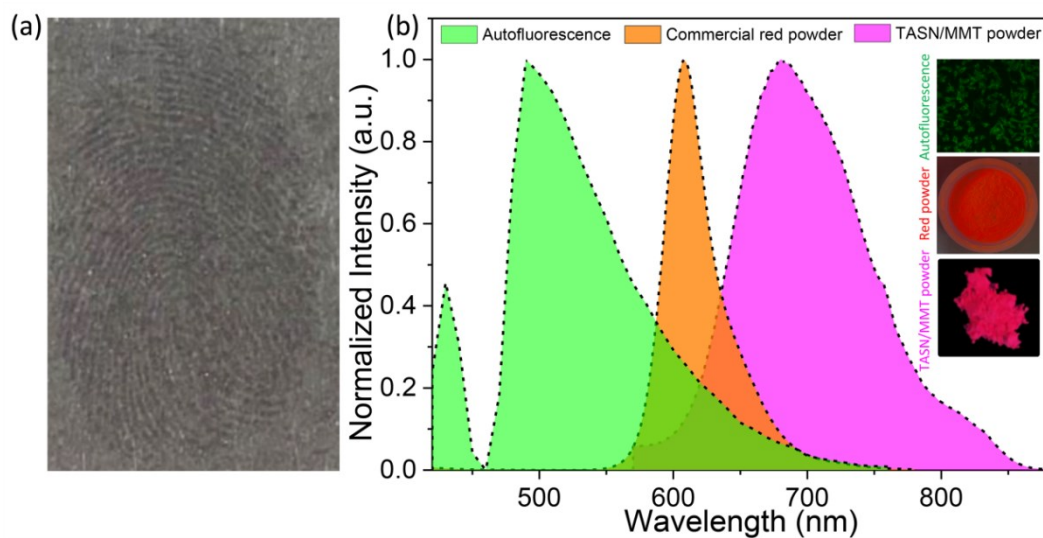

**Fig. S16** (a) LFP imaging of magnetic powder. (b) The emission spectra of auto-fluorescence with macrophages, commercial red powder and TASN/MMT powder. Inset: the corresponding fluorescent images.

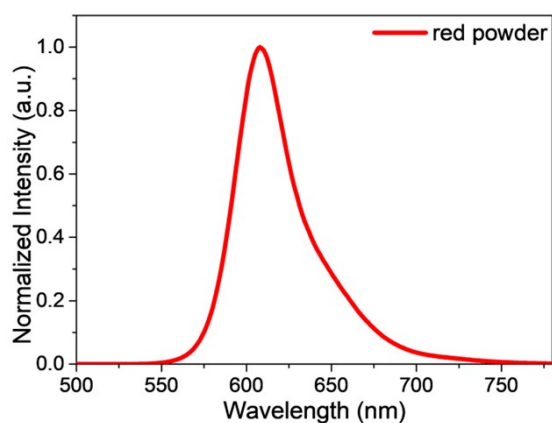

**Fig. S17** The emission spectrum of commercial red fingerprint powder in solid state.

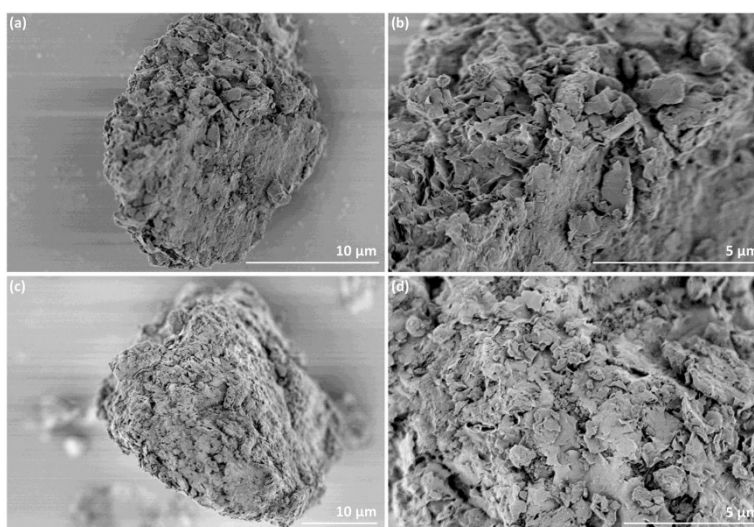

**Fig. S18** SEM images of (a-b) MMT powders and (c-d) TASN/MMT composite powders.

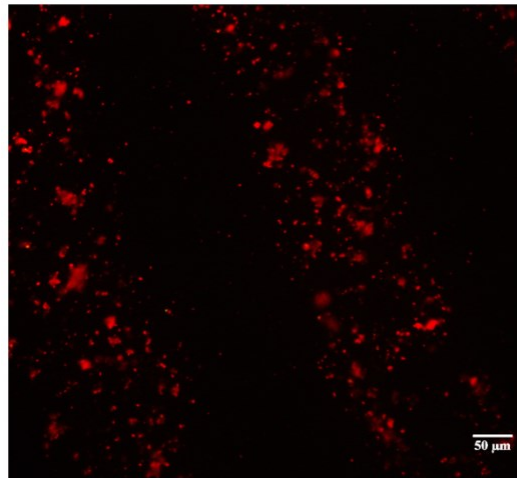

**Fig. S19** Fluorescence image of the developed LFP. The scale bar is 50 μm.

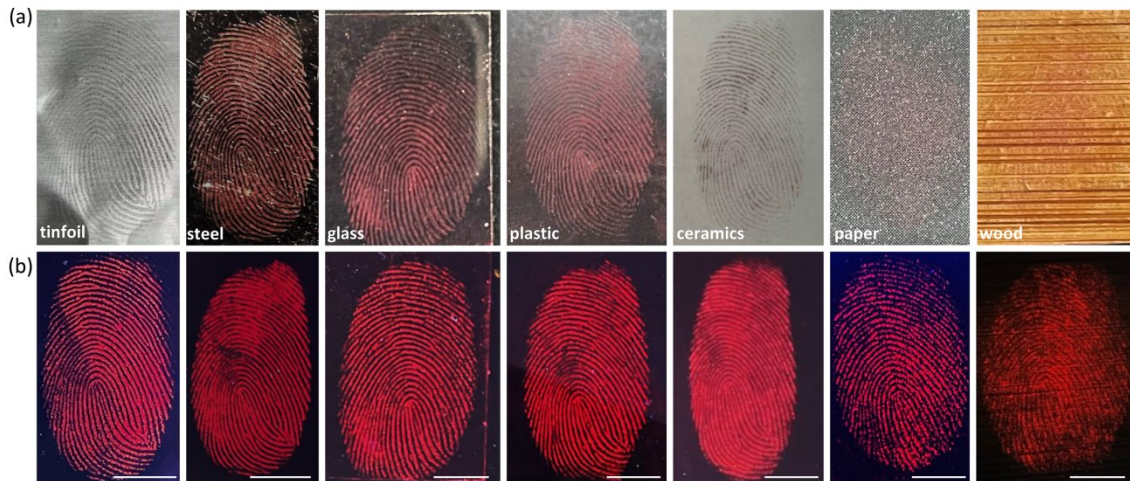

**Fig. S20** Fingerprints stained with TASN/MTT powder under (a) white light and (b) 405 nm irradiation. The scale bar is 0.5 mm.

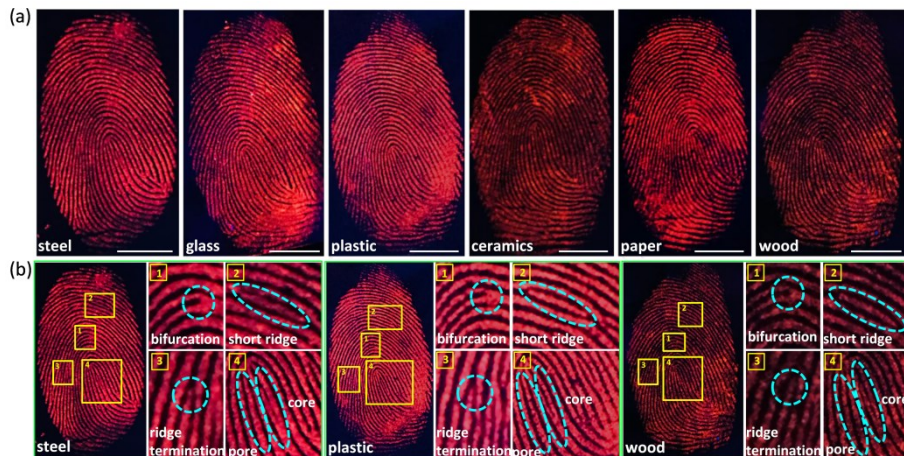

**Fig. S21** RGB true-color photographs (under 405 nm irradiation) of whole LFPs on different substrates were developed by TASN/MMT powders. (b) Level 1, level 2, and level 3 details of local LFPs on steel, plastic, and wood developed by TASN/MMT powders. The scale bars are 0.5 mm.

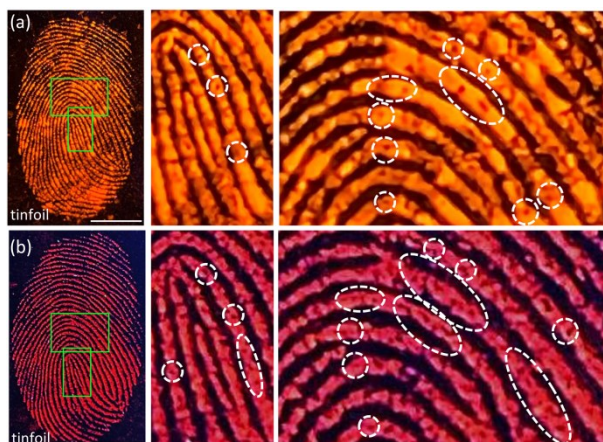

**Fig. S22** Fluorescence images about level 3 details of LFP on tinfoil developed with (a) commercial red fingerprint powder and (b) TASN/MTT powder under the excitation of 405 nm light.

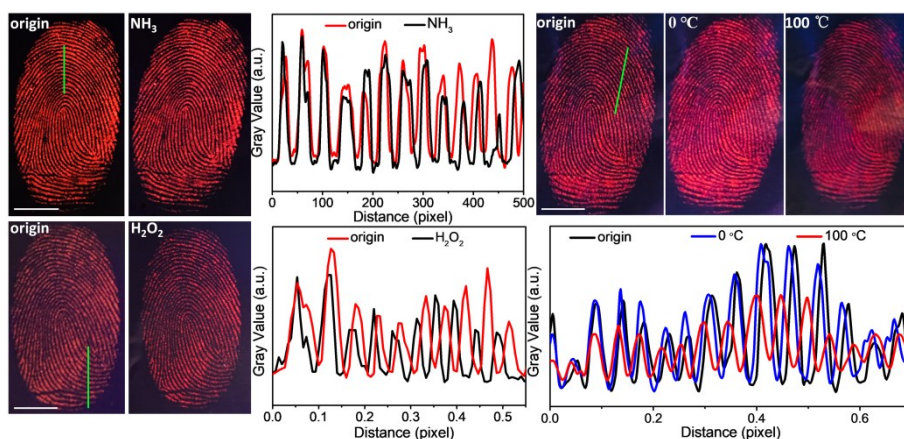

**Fig. S23** Photographs of latent fingerprints developed with TASN/MMT powders on glass slide before and after abrasion with low/high temperature, hydrogen peroxide and ammonia treatment. The scale bars are 0.5 mm.

#### 4. References

- [1] a) C. Lv, W. Liu, Q. Luo, H. Yi, H. Yu, Z. Yang, B. Zou, Y. Zhang, *Chem.Sci.* **2020**, *11*, 4007-4015; b) Q. Luo, L. Li, H. Ma, C. Lv, X. Jiang, X. Gu, Z. An, B. Zou, C. Zhang, Y. Zhang, *Chem. Sci.* **2020**, *11*, 6020-6025.
- [2] A. Labrunie, Y. Jiang, F. Baert, A. Leliège, J. Roncali, C. Cabanetos, P. Blanchard, *RSC Adv.* **2015**, *5*, 102550-102554.
